# Supplementary material for: A spatiotemporal meta-analysis of HIV/syphilis epidemic among men who have sex with men living in mainland China
Source: Springer Nature journal article supplement (doi:10.1186/s12879-018-3532-8), 2018-12-01
Supplement: MOESM3 [file 16336700]

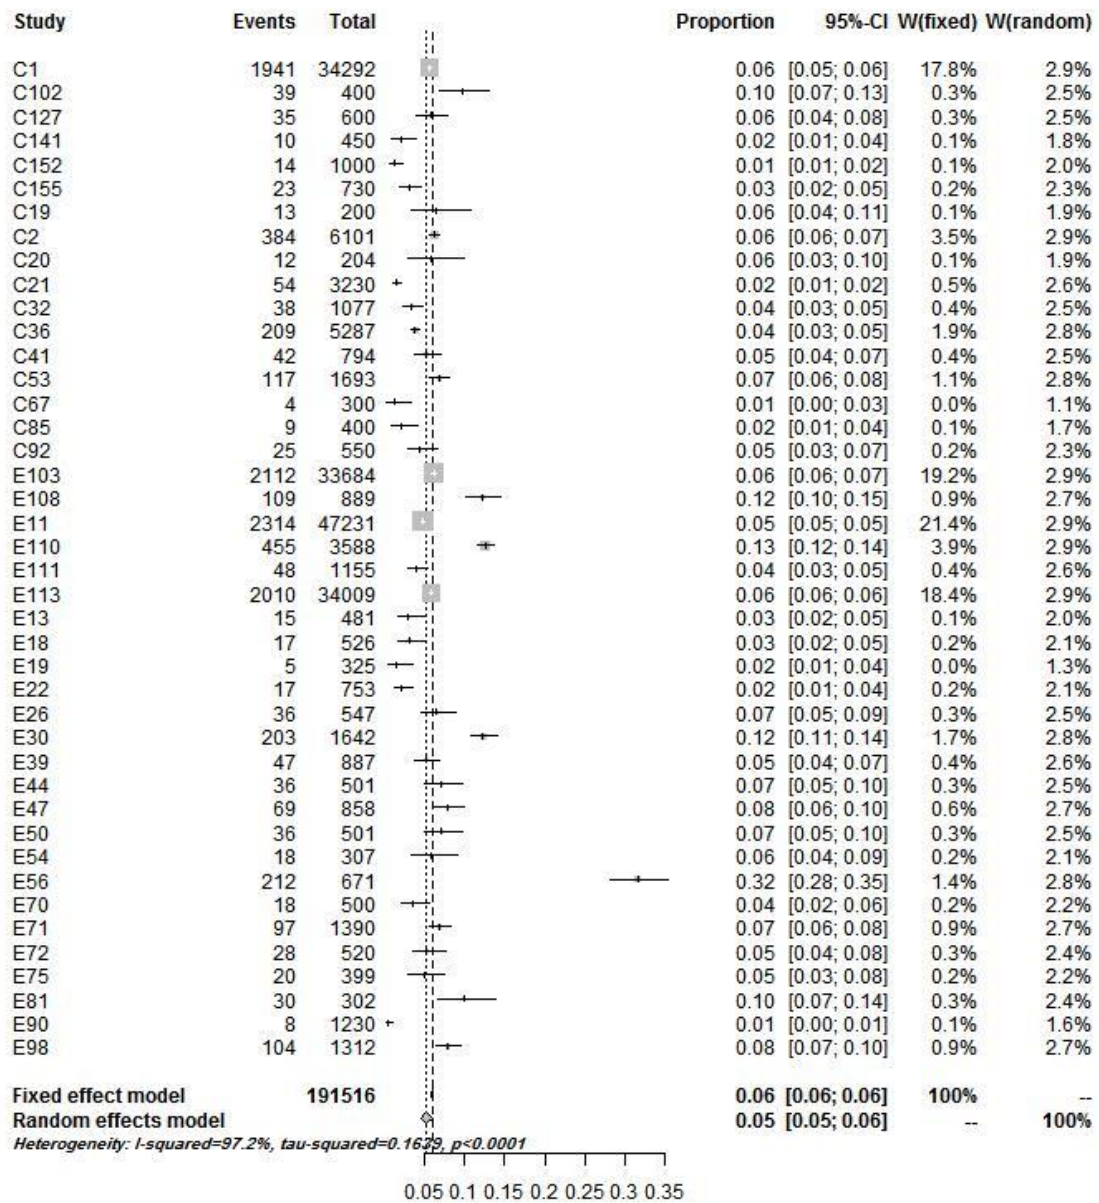

Meta-analysis of HIV prevalence in among MSM in North China

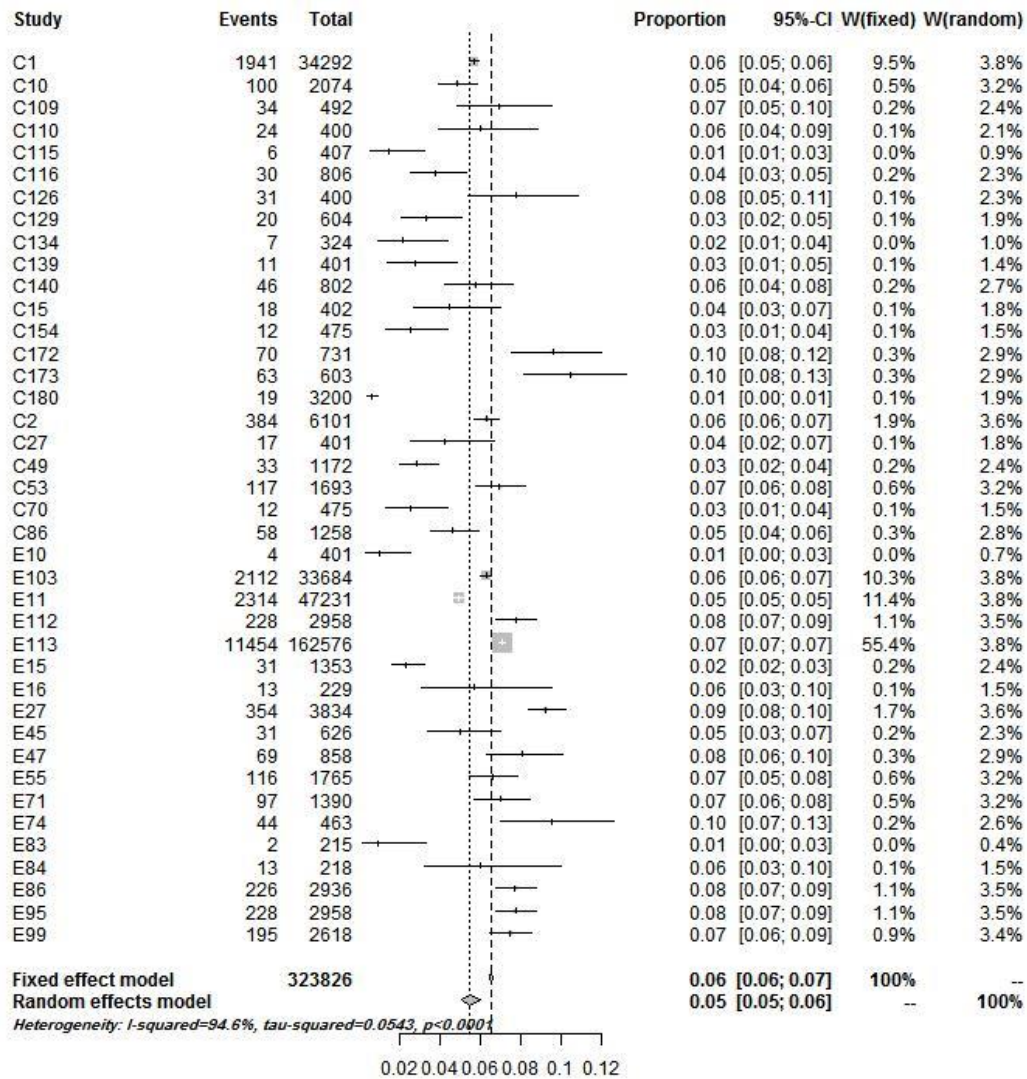

**Meta-analysis of HIV prevalence in among MSM in Northeast China**

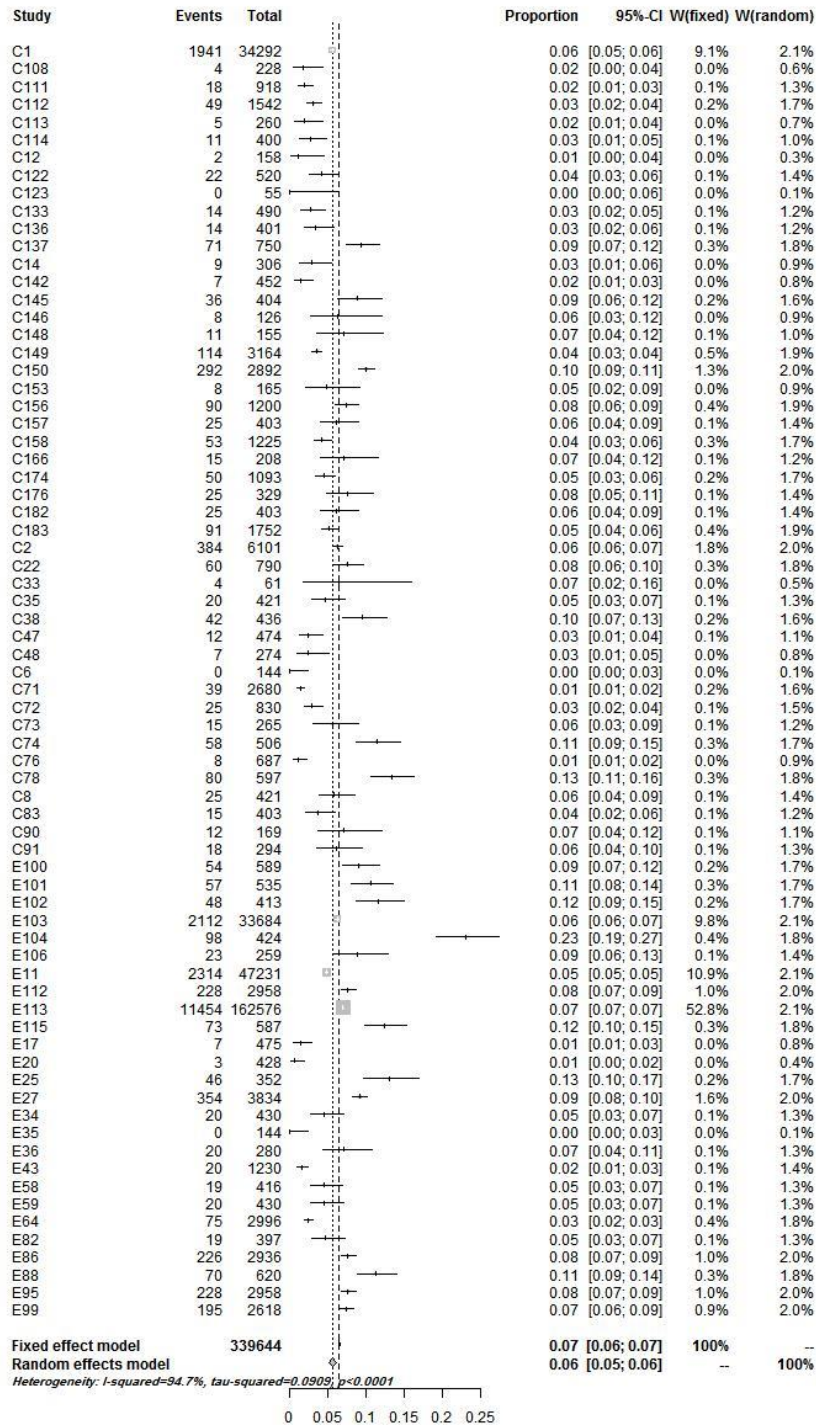

## Meta-analysis of HIV prevalence in among MSM in East China

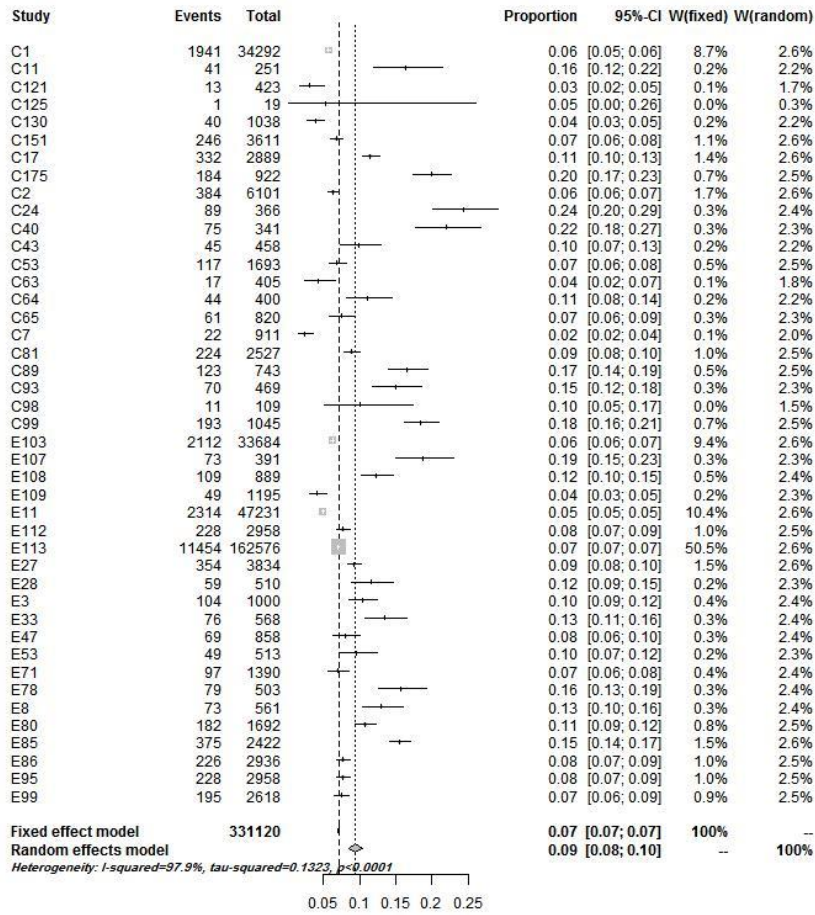

## Meta-analysis of HIV prevalence in among MSM in Southwest China



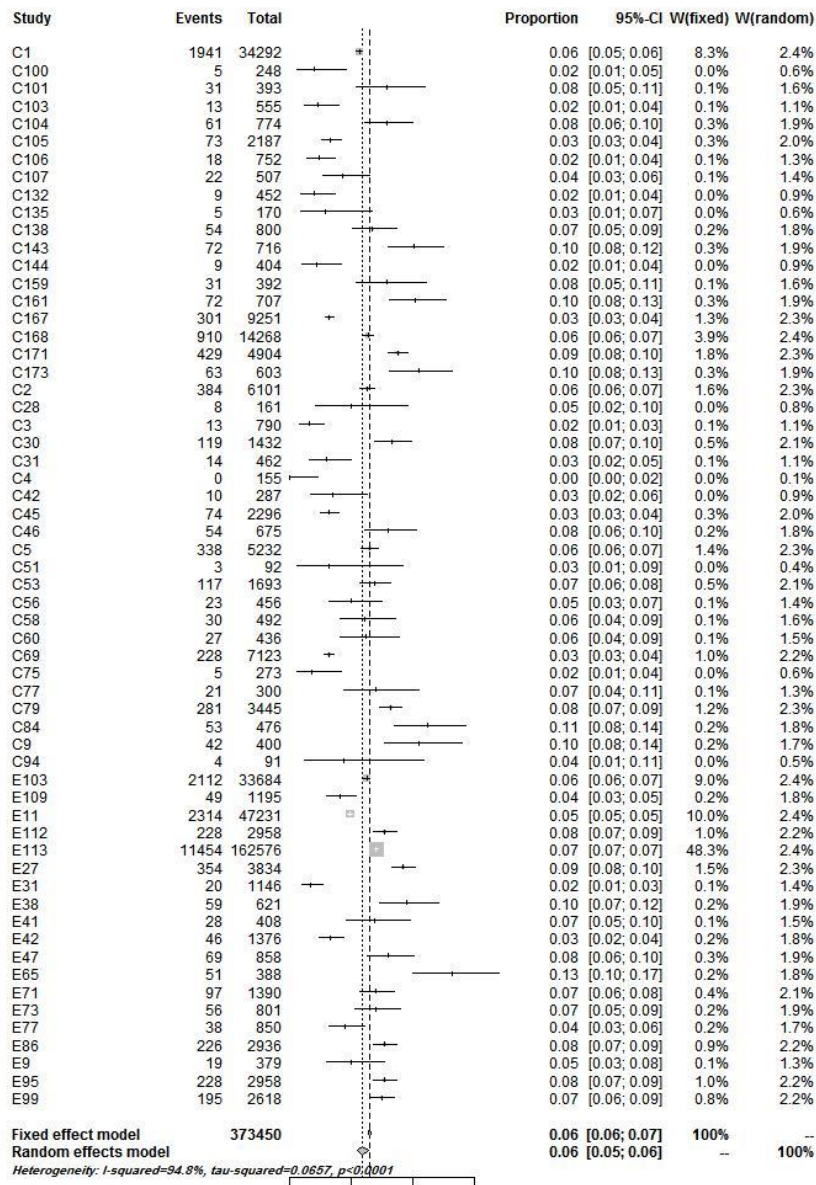

## Meta-analysis of HIV prevalence in among MSM in Southcentral China

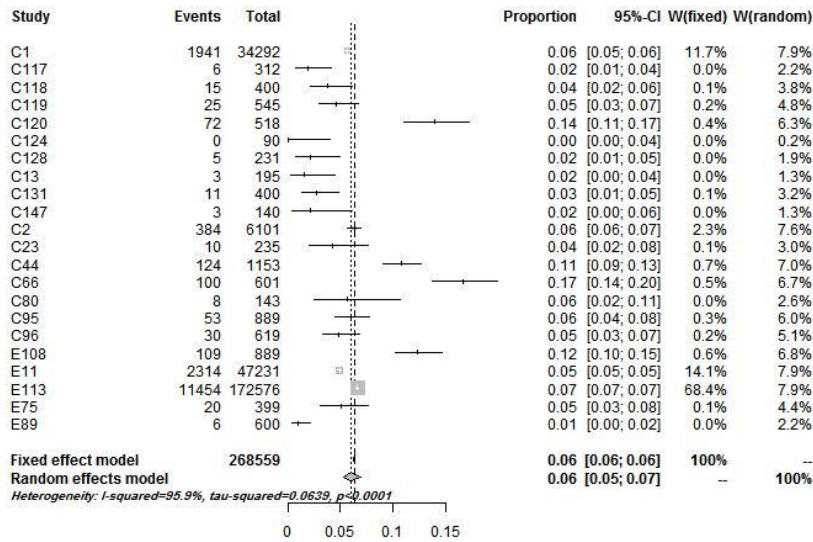

### Meta-analysis of HIV prevalence in among MSM in Northwest China

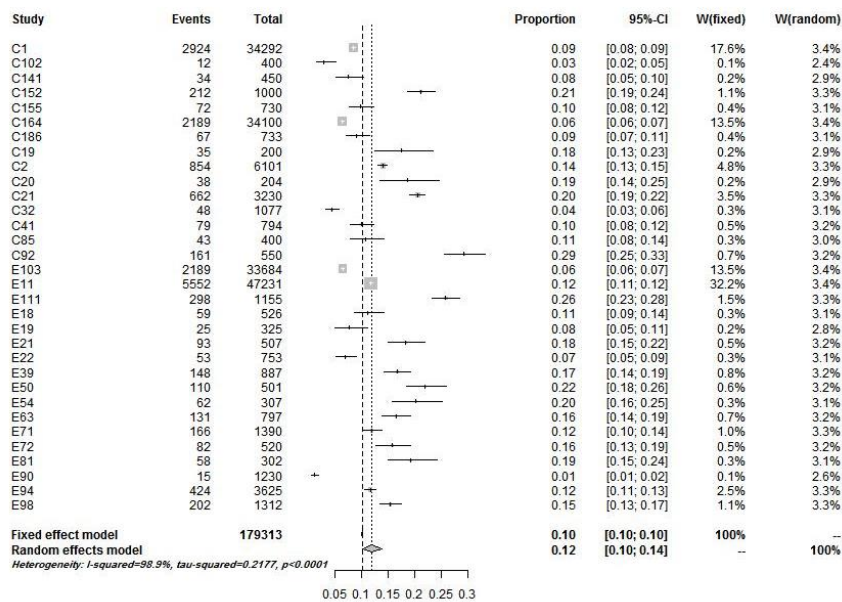

### Meta-analysis of syphilis prevalence in among MSM in North China

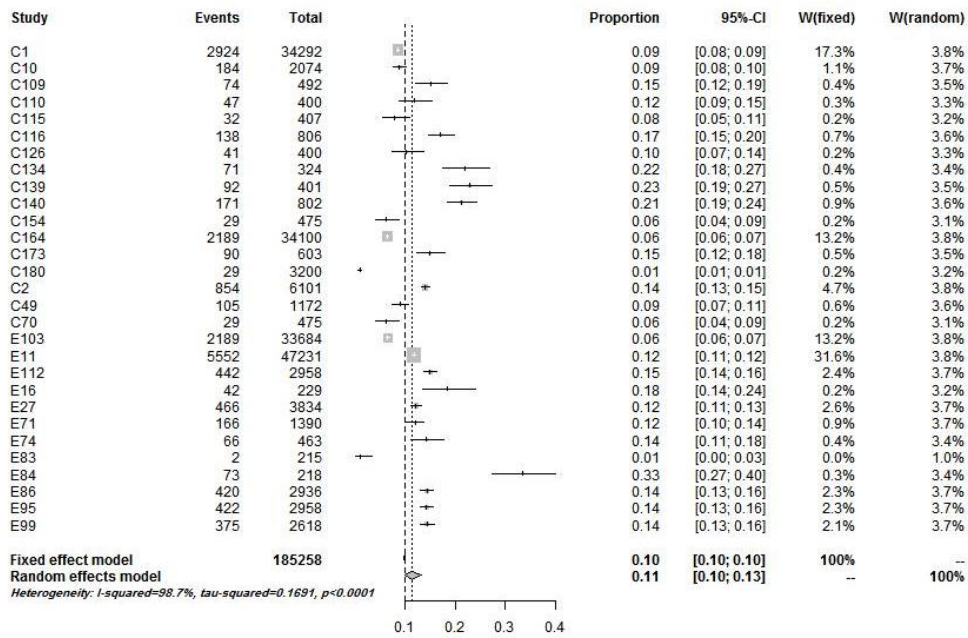

### Meta-analysis of syphilis prevalence in among MSM in Northeast China

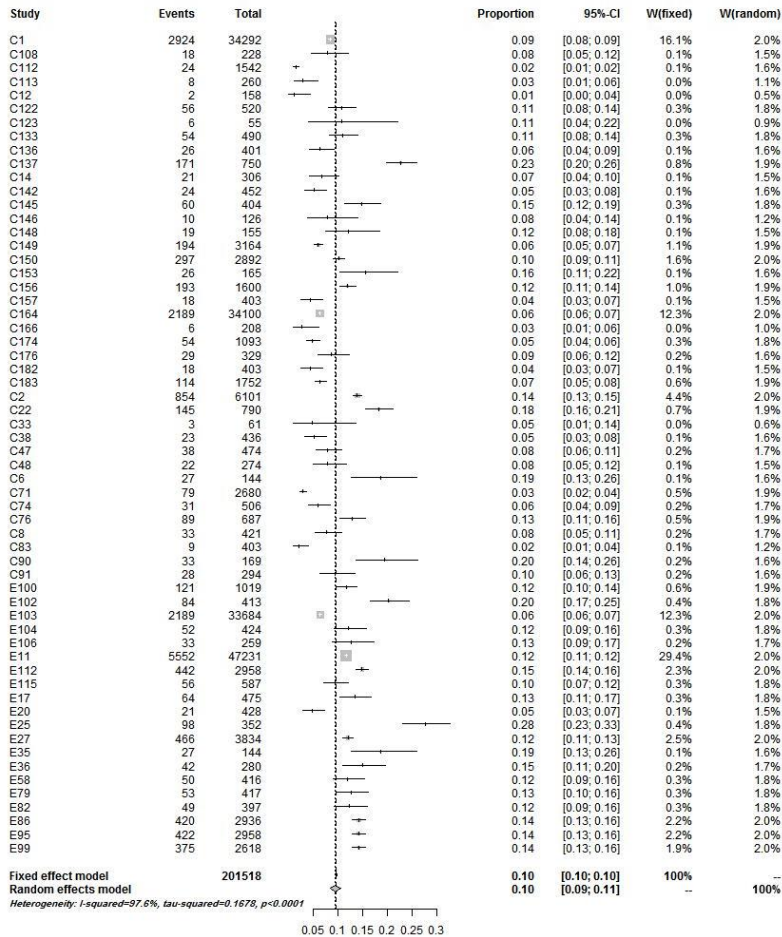

### Meta-analysis of syphilis prevalence in among MSM in East China

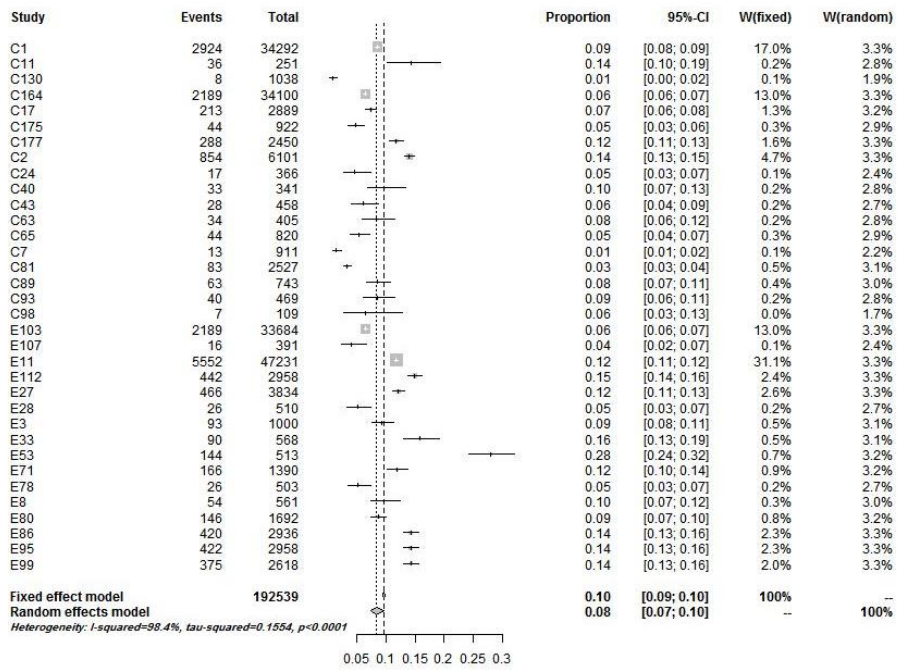

### Meta-analysis of syphilis prevalence in among MSM in Southwest China

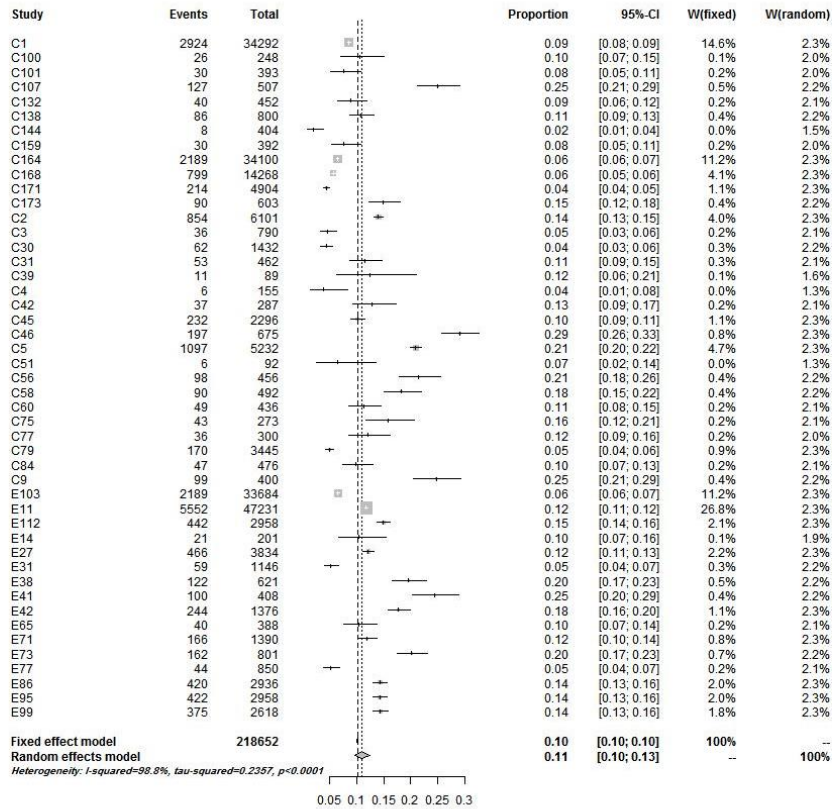

### Meta-analysis of syphilis prevalence in among MSM in Southcentral China



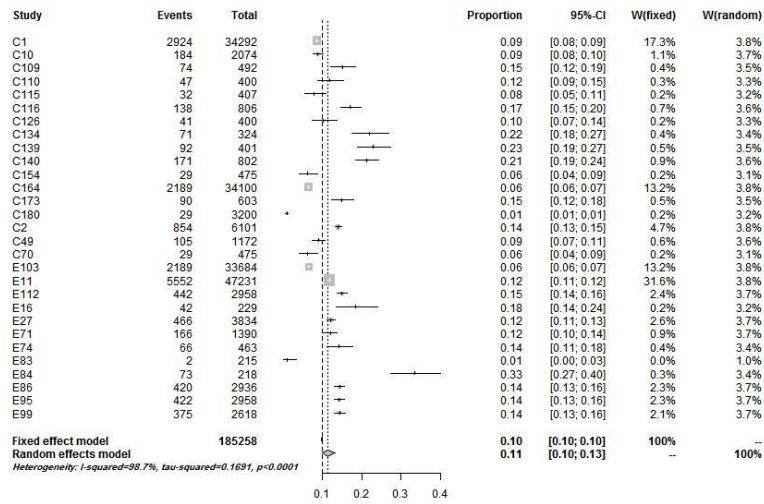

## Meta-analysis of syphilis prevalence in among MSM in Northwest China
