# Supplementary material for: A spatiotemporal meta-analysis of HIV/syphilis epidemic among men who have sex with men living in mainland China
Source: Springer Nature journal article supplement (doi:10.1186/s12879-018-3532-8), 2018-12-01

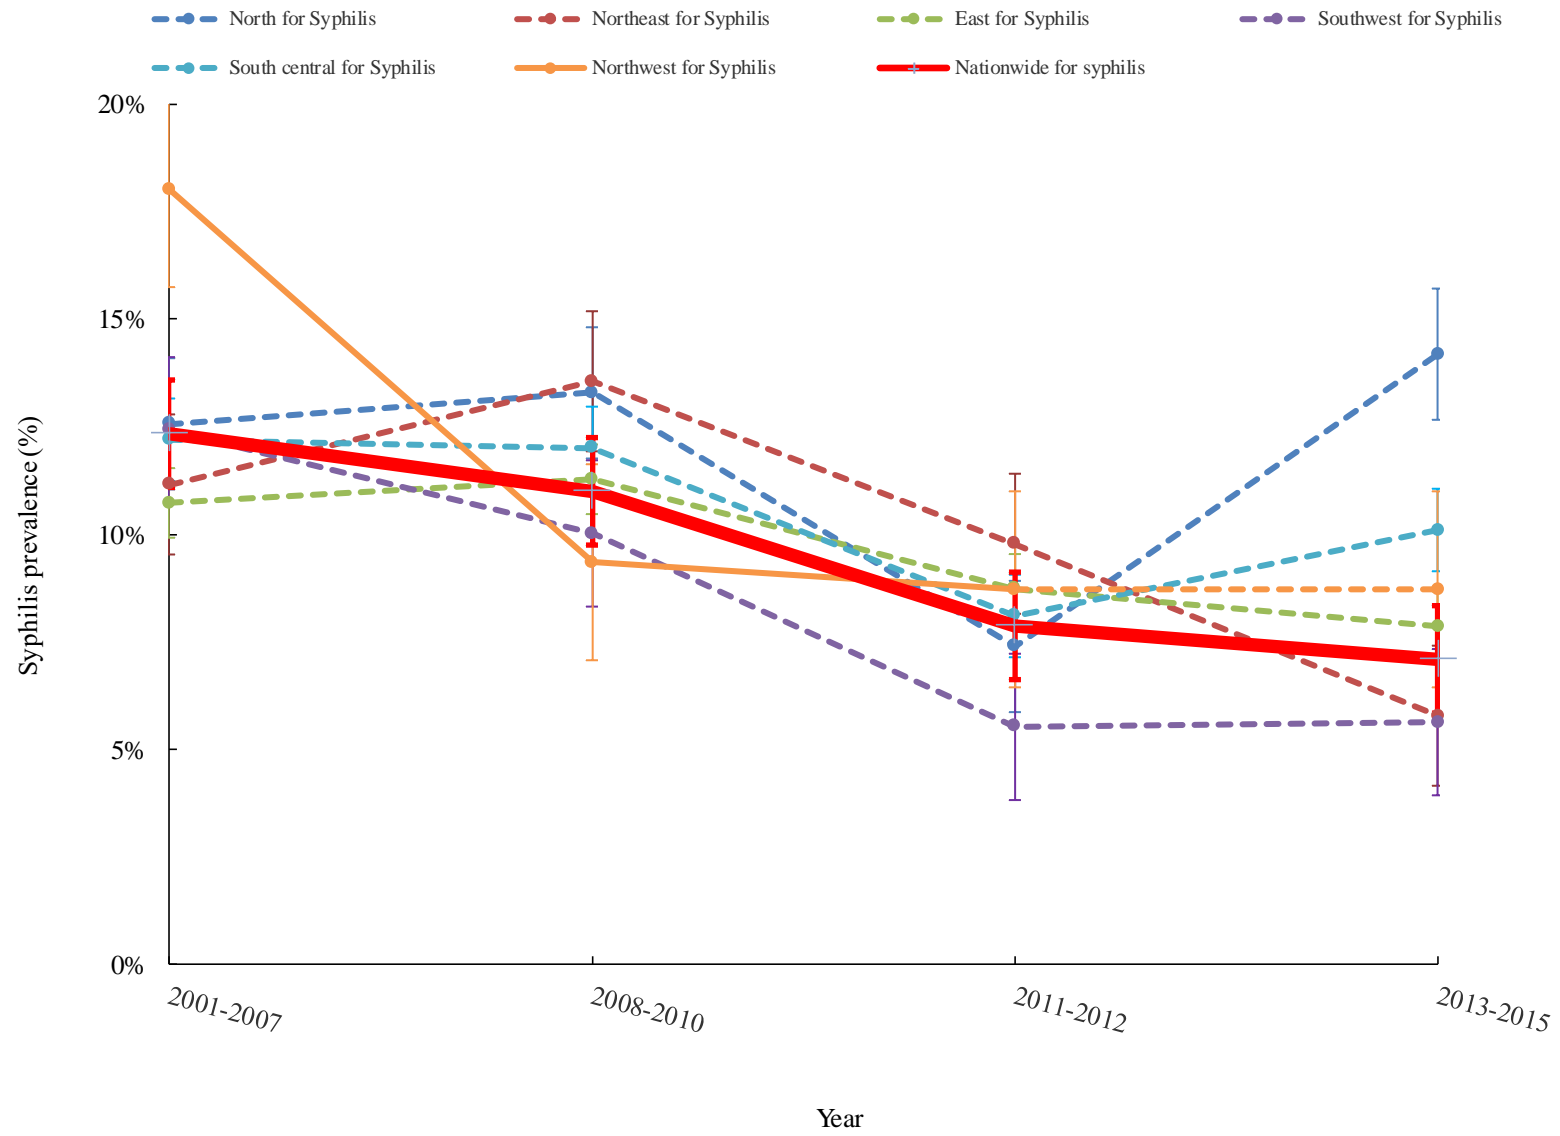

Supplement: MOESM4 [file 16336700]
