# Supplementary material for: A spatiotemporal meta-analysis of HIV/syphilis epidemic among men who have sex with men living in mainland China
Source: BMC Infect Dis. 2018 Dec 12;18:652. doi: 10.1186/s12879-018-3532-8 (PMC6292157; doi:10.1186/s12879-018-3532-8)
Supplement: Supplementary file 2 — Dataset listing extracted data of 272 articles included. The dataset includes periodic and demographic information, the crude HIV and syphilis prevalence rate, and history of condom use with male partner, female, and unprotected sex with casual male partner. (XLSX 37 kb) [file 12879_2018_3532_MOESM2_ESM.xlsx]

## Sheet: MSM Data
Article No.	First author	Province/Area	Published year	Published period	Survey year	Survey period	Sample size	Sampling method	HIV infection rate (crude/adjusted)	Syphilis infection rate (crude/adjusted)	History of condom use with male partner	History of condom use with female	History of unprotected sex with casual male partners
C1	Dongming Li	30 provinces	2014	2013-2016	2010	2008-2010	34292	Snowball	1941(5.7)	2924(8.6)	11845(34.5)
C10	Zhenxing Chu	Liaoning	2011	2011-2012	2008	2008-2010	2074	Snowball	100(4.8)	184(8.9)
C100	Bin He	Hainan	2011	2011-2012	2010	2008-2010	248	Snowball, internet-based	5(2)	26(10.5)
C101	Lianfen Chen	Hainan	2013	2013-2016	2012	2011-2012	393	Classified Snowball	0.079	7.6
C102	Xueru Feng	Hebei	2013	2013-2016	2011	2011-2012	400		39(9.8)	12(3.0)
C103	Xin Zhu	Henan	2012	2011-2012	2008-2009	2008-2010	555		13(2.34)
C104	Xiaohui Chen	Hubei	2007	2001-2007	2003-2005	2001-2007	774		61(7.88)
C105	Tinghai Peng	Hubei	2015	2013-2016	2010	2008-2010	2187		Adjusted: 73(3.34(2.59-4.09))
C106	Chun Sun	Hubei	2014	2013-2016	2012-2013	2011-2012 2013-2015	752		18(2.39)
C107	Yeying Liu	Hunan	2010	2008-2010	2007-2009	2001-2007 2008-2010	507	classified-Snowball	22(4.33)	127(25.05)
C108	Juan Xu	Anhui	2007	2001-2007	2005	2001-2007	228	RDS	4(1.8)	18(8.1)
C109	Wei Guo	Jilin	2012	2011-2012	2009	2008-2010	492	RDS	Crude: 34(6.9) Adjusted: 7.4(5.1,10.1)	74(16.3)
C11	Zewei Dai	Sichuan	2011	2011-2012	2009	2008-2010	251	Snowball	41(16.33)	36(14.34)	59(30.73)
C110	Shujuan Mei	Jilin	2014	2013-2016	2012	2011-2012	400	Classified Snowball	24(6)	47(11.8)	325(81.3)	45(72.1)
C111	Fanghua Wang	Anhui	2011	2011-2012	2009	2008-2010	918	Classified Snowball, venue bases	18(1.96)		310(42.35)	60(31.07)
C112	Jun Fu	Jiangxi	2014	2013-2016	2013	2011-2015	1542	Classified Snowball, venue-based, online	49(3.2)	24(1.6)	807(63.1)	128(45.1)
C113	Wenjun Huang	Jiangxi	2011	2011-2012	2009	2008-2010	260	RDS	5(1.92)	8(3.08)	160	8
C114	Yilian Tang	Jiangxi	2014	2013-2016	2012	2011-2012	400	RDS	11(2.75)		138(40)	0
C115	Li Zhao	Liaoning	2012	2011-2012	2008	2008-2010	407	Snowballl	6(1.5)	32(7.9)	248(75.6)	37(33.9)
C116	Lin Qu	Inner Mongolia	2011	2011-2012	2010	2008-2010	806	Classified Snowball	30(3.73)	138(17.14)	626(77.76）	9(6.25)
C117	Zhifeng Miao	the Ningxia Hui Autonomous Region	2009	2008-2010	2008	2008-2010	312	classified Snowball	6(1.9)	2.9	191
C118	Zhifeng Miao	the Ningxia Hui Autonomous Region	2012	2011-2012	2011	2011-2012	400	RDS, Classified Snowball	15(3.8)	72(18)	323(80.8)
C119	Changcheng Zhao	Qinghai	2011	2011-2012	2008-2009	2008-2010	545	Classified snoball	25(4.59)	47(8.62)
C12	Wei Ding	Shandong	2014	2013-2016	2013	2011-2015	158	Multiple	2(1.33)	2(1.33)
C120	Yulan Sun	Qinghai	2013	2013-2016	2011-2012	2011-2012	518	RDS, classitied Snowball	72(13.9)		233(72.6)	78(54.9)
C121	Yi Huang	Sichuan	2013	2013-2016	2008	2008-2010	423	Convenience	13(3.07)
C122	Dandan Zhang	Zhejiang	2010	2008-2010	2009	2008-2010	520	Classified Snowball	22(4.2)	56(10.8)	294(69.2)	60(40.5)
C123	Lijun Fu	Zhejiang	2007	2001-2007	2006	2001-2007	55	Snowball	0	6(11.76)
C124	Xing Gao	the Ningxia Hui Autonomous Region	2008	2008-2010	2007	2001-2007	90	RDS, Snowball	0
C125	Yugui Ma	Tibet Autonomous Region	2010	2008-2010	2008-2009	2008-2010	19		1(5)
C126	Xu Wang	Liaoning	2012	2011-2012	2011	2011-2012	400	Snowball	31(7.75)	41(10.25)
C127	Juan Xu	Beijing	2010	2008-2010	2008	2008-2010	600	RDS	35(6)
C128	Man Zhang	the Xinjiang Uygur Autonomous Region	2009	2008-2010	2008	2008-2010	231	RDS	5(2.16)	10.82	130(67.71)
C129	Lin Qu	Inner Mongolia	2009	2008-2010	2008	2008-2010	604	Convenience	20(3.3)
C13		Shanxi陕西	2014	2013-2016	2012	2011-2012	195	referral	3(1.54)		64(59.3)
C130	Zhijuan Chen	Yunnan	2014	2013-2016	2010-2013	2008-2010 2011-2012 2013-2015	1038	Snowball	40(3.9)	8(0.8)
C131	Jijun Chen	Gansu	2014	2013-2016	2011	2011-2012	400	Snowball	11(2.75)	59(14.75)
C132	Shihai Chen	Guangxi	2009	2008-2010	2008	2008-2010	452	Snowball	9(1.99)	40(8.85)	140(34.83)
C133	Guoping Ji	Anhui	2010	2008-2010	2008	2008-2010	490		14(2.9)	54(11)
C134	Ying Jing	Heilongjiang	2010	2008-2010	2008	2008-2010	324		7(2.16)	71(21.91)
C135	Dandan Sui	Guangdong	2015	2013-2016	2009	2008-2010	170	Classified Snowball	5(2.9)
C136	Xue Ouyang	Fujian	2014	2013-2016	2011	2011-2012	401	HSS	14(3.5)	26(6.5)	372
C137	Zhijun Wang	Jiangsu	2010	2008-2010	2008-2009	2008-2010	750	Convenient	71(9.47)	171(22.8)	372	120
C138	Guoqiang Zhang	Hunan	2013	2013-2016	2009-2011	2008-2010 2011-2012	800	Convenient	54(8)	86(10.75)
C139	Xiangyun Xu	Inner Mongolia	2011	2011-2012	2009	2008-2010	401		11(2.74)	92(22.94)
C14	Lei Dong	Shandong	2012	2011-2012	2011	2011-2012	306	RDS	9(2.94)	21(6.86)	166(62.88)	31(31.63)
C140	Lin Qu	Inner Mongolia	2012	2011-2012	2011	2011-2012	802	Volunteer	46(5.74)	171(21.32)
C141	Liang Liang	Hebei	2009	2008-2010	2008	2008-2010	450	Volunteerly come, Snowball	10(2.2)	34(7.6)
C142	Yanwen Zhu	Shandong	2011	2011-2012	2008	2008-2010	452	VCT	7(1.55)	24(5.31)	119(31.65)	36(32.43)
C143	Wanghua Li	Hubei	2011	2011-2012	2008	2008-2010	716		72(10.06)
C144	Anlu Mao	Hubei	2011	2011-2012	2010	2008-2010	404		9(2.23)	8(1.98)	79(21.35)	16(8.89)
C145	Dan Zhang	Zhejiang	2013	2013-2016	2010	2008-2010	404		36(8.9)	60(14.9)	168(64.6)
C146	Wei Zhou	Zhejiang	2014	2013-2016	2014	2011-2015	126	RDS	8(6.35)	10(7.94)	54	4	37
C147	Junhui Zhang	the Xinjiang Uygur Autonomous Region	2012	2011-2012	2008	2008-2010	140	Classified Snowball	3(2.14)	11(7.86)	66	25
C148	Huineng Zheng	Fujian	2013	2013-2016	2010	2008-2010	155	Classified Snowball	11(7.1)	19(12.3)	43(27.7)
C149	Pengxiang Huang	Shandong	2015	2013-2016	2013	2011-2015	3164	HSS	3.6	6.13	1983(80.38)	428(58.39)
C15	Jianhua Du	Inner Mongolia	2013	2013-2016	2011	2011-2012	402	HSS	18(4.5)		209(52.0)	49(12.2)
C150	Jie Jin	Zhejiang	2015	2013-2016	2009-2014	2008-2010 2011-2015	2892	Snowball	Adjusted: 10.10% (95% CI: 9.00% ～ 11.20% )	10.27		2008(69.43)
C151	Li Yang	Yunnan	2015	2013-2016	2011-2012	2011-2012	3611	Snowball	2011: 88(6.77) 2012: 158 (6.84)
C152	Hui Zhang	Tianjin	2015	2013-2016	2013	2013-2015	1000	Community outreach	1.4	21.2
C153	Yanqiu Zhou	Shanghai	2015	2013-2016	2011-2013	2011-2012 2013-2015	165	Snowball	8(10.9)	26(15.8)
C154	Jinling Xu	Liaoning	2015	2013-2016	2012	2011-2012	475	Community referral	12(2.5)	29(6.1)		254(53.5)
C155	Jianyun Bai	Tianjin	2015	2013-2016	2012	2011-2012	730	Convenience	23(3.2)	72(9.9)
C156	Hui Yang	Shandong	2015	2013-2016	2010-2013	2008-2010 2011-2012	1600	Quota	2010:2 2011:5 2012:6.8 2013:10.8	2010:6 2011:9.5 2012:15 2013:17.8	155		50
C157	Xuhong Yang	Shandong	2016	2013-2016	2015	2011-2015	403	Quota	25(6.20)	18(4.47)	132(38.60)	23(19.83)
C158	Liyang Qiu	Zhejiang	2016	2013-2016	2011-2015	2011-2012 2013-2015	1225	VCT	53(4.33)
C159	Lianfen Chen	Hainan	2015	2013-2016	2012	2011-2012	392	Snowball	31(7.9)	30(7.7)	163(41.6)	127(32.5)
C160	Hongxin Liu	Beijing	2015	2013-2016	2009-2013	2008-2010 2011-2012 2013-2015	252	HSS	2009: 0 2010: 3(6.12) 2011: 12(9.30) 2012: 17(22.67) 2013: 11(19.64)
C161	Qingshan Luo	Guangdong	2015	2013-2016	2013	2013-2015	707	TLS and RDS	72（10.18）		350(49.50)
C162	Ping Cen	Guangxi	2015	2013-2016	2010-2013	2008-2010 2011-2012 2013-2015	1819	Snowball			797
C163	Jikun Dai	Yunnan	2015	2013-2016	2014	2013-2015	207	Snowball
C164	Jinlei Qi	Beijing, Shanghai, Tianjin, Chongqing, Heilongjiang, Liaoning, Shandong, Shanxi（陕西）, Jiangsu, Hubei, Zhejiang, Hunan, Yunnan, and Guangdong	2015	2013-2016	2011	2011-2012	34100	Venue-based		2189(6.7)
C166	Lin Li	Fujian	2015	2013-2016	2012	2011-2012	208	Snowball	15(7.2)	6(2.88)	181(87.0)	14(21.9)
C167	Luxiang Zheng	Hubei	2015	2013-2016	2010-2013	2008-2010 2011-2012 2013-2015	2860	HSS	2010:3.34% 2011:3.74% 2012:2.96% 2013:3.15%		1113
C168	Tinghai Peng	Henan	2015	2013-2016	2008-2013	2008-2010 2011-2012 2013-2015	14268	Snowball	910(6.38)	799(7.8)	6701(55.3)
C17	Yanming Ma	Sichuan	2012	2011-2012	2011	2011-2012	2889	Convenience, Snowball	332(11.5)	213(7.4)	850(34.2)	370(58.0)
C170	Lijun Song	Yunnan	2015	2013-2016	2010-2013	2008-2010 2011-2012 2013-2015	9073	Snowball			7782	4609
C171	Qiongmiao Wu	Guangdong	2015	2013-2016	2011-2012	2011-2012	4904	N/A	429(8.7)	214(4.4)		3183(65.0)
C172	Shan Hui	Heilongjiang	2015	2013-2016	2013	2013-2015	661	Snowball	9.6(95%CI:7.4-11.7)
C173	Danzhao Xiao	Guangdong Heilongjiang	2016	2013-2016	2015	2013-2015	603	Snowball	63(10.4)	90(14.9)
C174	Qiaoling Lu	Zhejiang	2016	2013-2016	2011-2013	2011-2012 2013-2015	1093	Snowball	50(4.57)	54(4.94)	415(47.16)	32(2.93)
C175	Caixia Zhou	Guizhou	2016	2013-2016	2010-2014	2008-2010 2011-2012 2013-2015	922	HSS	184(19.96)	44(4.77)	281	883	354
C176	Cuihau Gong	Shandong	2016	2013-2016	2014	2011-2015	329	HSS	25(7.60)	29(8.81)		276(83.89)
C177	Xihe Zhao	Sichuan	2016	2013-2016	2009-2014	2008-2010 2011-2012 2013-2015	2450	Snowball		2009: 65(18.21) 2010: 31(7.42) 2011: 46(11.17) 2012: 40(9.78) 2013: 24(6.00) 2014: 82(7.55)	277	25
C178	Xingqing Qiu	Hubei	2016	2013-2016	2014	2013-2015	400	Snowball			259(64.75)	14(3.50)
C179	Xiuyun Zhang	Shandong	2016	2013-2016	2014	2011-2015	1849	Community outreach			1071(57.92)
C18	Zhuohua Fu	Jiangsu	2014	2013-2016	2010-2012	2008-2010 2011-2012	686	Convenience			189(31.0)
C180	Yuying Li	Jilin	2016	2013-2016	2013-2014	2013-2015	3200	Quota	19(2.38)	29(3.63)
C181	Xingzeng He	Fujian	2016	2013-2016	2010-2014	2008-2010 2011-2012 2013-2015	1594	Snowball	2010: 7.2 2011: 7.7 2012: 9.6 2013: 12.8 2014: 23.8		550(44.39)	109(23.14)
C182	Xuhong Yang	Shandong	2016	2013-2016	2015	2011-2015	403	Community outreach	25（6.20）	18(4.47）	259(72.81)	81(69.83)
C183	Haiyan Hou	Fujian	2016	2013-2016	2010-2014	2008-2010 2011-2012 2013-2015	1752	Snowball	91(5.24)	114(6.51)	712(66.11)	258(34.91)
C185	Liangjia Zhou	Jiangsu	2016	2013-2016	2013-2014	2011-2015	569	Snowball, peer recommendation
C186	Maohe Yu	Tianjin	2016	2013-2016	2011-2013	2011-2012 2013-2015	733	RDS		67(9.14)	329(44.88)
C19	Wei Guo	Hebei	2010	2008-2010	2007	2001-2007	200	Convenience (MSM gathering place)	13(7.3)	35(19.8)
C2	Yugang Bao	14 large or medium cities	2009	2008-2010	2008	2008-2010	6101	RDS	384(6.3)	854(14)	3978(65.2)
C20	Yan Guo	Tianjin	2009	2008-2010	2007	2001-2007	204	convienience	12(5.9)	38(18.7)	98(47.9)	18(8.8)
C21	Yanguo	Tianjin	2013	2013-2016	2008	2008-2010	3230	HSS	54(6.7)	20.5
C22	Jiangnan He	Shanghai	2012	2011-2012	2011	2011-2012	790	Convenience	7.59(5.74,9.44)	18.35(15.65-21.5)
C23	Shengxu He	Qinghai	2012	2011-2012	2009-2011	2008-2010 2011-2012	235	Convenient	10(4.26)	2(0.85)	46(19.4)	87(37.2)
C24	Qinglan Huang	Sichuan	2012	2011-2012	2011	2011-2012	366	Convenience	89(24.32)	17(4.46)	210	68
C26	Lintao Li	Guangdong	2014	2013-2016	2011	2011-2012	589	RDS
C27	Dejun Li	Liaoning	2009	2008-2010	2008	2008-2010	401	Convenience	17(4.24)		273(78.4)	76(58.0)
C28	Lintao Li	Guangdong	2010	2008-2010	2009	2008-2010	161	RDS	8(5)
C29	Xinxu Li	Beijing	2007	2001-2007	2005	2001-2007	226	Convenience
C3	Yu Bai	Guangxi	2009	2008-2010	2007-2008	2001-2007 2008-2010	790	Multiple	13(1.82)	36(6.33)
C30	Xiuju Li	Henan	2014	2013-2016	2011-2012	2011-2012	1432	Multiple	119(8.89)	62(4.63)	786(54.89)
C31	Guanghua Lan	Guangxi	2014	2013-2016	2011	2011-2012	462	Snowball	14(3)	53(11.5)	401(92.0)
C32	Liumei Liao	Hebei	2014	2013-2016	2010-2012	2008-2010 2011-2012	1077	Snowball	38(3.53)	48(4.46)	762(78.5)	167(60.7)
C33	Meizhen Liao	Shandong	2006	2001-2007	2005	2001-2007	61	Convenience	4(6.6)	3(4.9)	26(42.0)
C34	Hui Liu	Beijing	2001	2001-2007	2008	2008-2010	84	Convenience				35(41.7)
C35	Xiaoyan	Jiangsu	2010	2008-2010	2008	2008-2010	421	RDS	20(4.8)
C36	Zhongquan Liu	Tianjin	2013	2013-2016	2010-2012	2008-2010 2011-2012	5287	Convienience	209(4.0)
C38	Liang Lu	Jiangxi	2014	2013-2016	2012	2011-2012	436	RDS	42(9.6)	23(5.3)
C39	Jinwei Lv	Hubei	2013	2013-2016	2011	2011-2012	89	Snowball		11(12.4)
C4	Yumao Cai	Guangdong	2008	2008-2010	2005	2001-2007	155	TLS	0	6(6.9)
C40	Lu Ma	Guizhou	2014	2013-2016	2009	2008-2010	341	Convenience	75(21.99)	33(9.68)	330(96.77)
C41	Lin Mei	Shanxi山西	2012	2011-2012	2008-2009	2008-2010	794	Snowball	42(5.29)	79(9.95)	467(68.18)	126(49.22)
C42	Xia Meng	Hunan	2010	2008-2010	2008-2009	2008-2010	287	Convenience	10(3.5)	37(12.9)
C43	Xiangdong Min	Yunnan	2013	2013-2016	2012	2011-2012	458	Convenience	45(9.83)	28(6.1)	365(82.0)	15(53.6)
C44	Mingjian Ni	the Xinjiang Uygur Autonomous Region	2014	2013-2016	2011-2012	2011-2012	1153	Convenience	124(10.8)	80(6.9)	319(27.7)	36(28.8)
C45	Quanxing Nong	Guangxi	2013	2013-2016	2009-2010	2008-2010	2296	RDS	74(3.2)	232(10.1)	1489(75.2)	122(40.7)
C46	Peng Pan	Guangdong	2012	2011-2012	2010	2008-2010	675	VCT, Snowball	54(8)	197(29.19)	435(68.29)	110(52.38)
C47	Yuesheng Qian	Shandong	2012	2011-2012	2011	2011-2012	474	RDS	12 (2.5)	38(8)	219(58.7)	51(34.2)
C48	Qisong Qing	Anhui	2014	2013-2016	2012	2011-2012	274	Snowball	7(3.5)	22(11)	27(9.9)	39(14.2)
C49	Baihong Qiu	Jilin	2009	2008-2010	2007	2001-2007	1172	Concenience	33(2.8)	105(9)	597(58.2)	113(43.5)
C5	Yumao Cai	Guangdong	2012	2011-2012	2005-2011	2001-2007 2008-2010	5232	Convenience	338(6.46)	1097(20.97)
C51	Xinbin Quan	Guangxi	2012	2011-2012	2007	2001-2007	92	RDS, Snowball	3(3.26)	6(6.52)	39(70.9)	5(31.2)
C53	Min She	Beijing, Heilongjiang, Henan, Sichuan	2012	2011-2012	2008	2008-2010	1693	Snowball	117(6.9)
C54	Yonghui Shi	Jiangxi	2012	2011-2012	2011	2011-2012	99	Convenience
C55	Wei Shi	Beijing	2008	2008-2010	2005	2001-2007	526	Convenience
C56	Weidong Shi	Hubei	2009	2008-2010	2008	2008-2010	456	Convienience	23(5.04)	98(21.49)	319(69.9)
C58	Wei Tan	Guangdong	2013	2013-2016	2009	2008-2010	492	RDS	Crude: 30(6.1) Adjusted: 4.6(2.59,6.7)	Crude: 18.3 Adjusted: 16.4(11.9,21)
C59	Jin Tian	Sichuan	2012	2011-2012	2010	2008-2010	291	Snowball			107(48.4)
C6	Ningxi Cao	Jiangsu	2006	2001-2007	2003	2001-2007	144	Convenience	0	27(18.75)
C60	Weiping Tian	Henan	2013	2013-2016	2011	2011-2012	436	Snowball	27(6.19)	49(11.24)		71(42.51)
C63	Yi Wang	Sichuan	2013	2013-2016	2011-2012	2011-2012	405	Snowball	17(4.2)	34(9.2)
C64	Yi Wang	Sichuan	2014	2013-2016	2009	2008-2010	356	RDS	44/400(11)		120(74.1)	12(44.4)
C65	Yi Wang	Sichuan	2013	2013-2016	2011	2011-2012	820	Snowball	61(7.4)	44(6.8)
C66	Dan wu	Tianjin	2013	2013-2016	2011	2011-2012	601	Convenience	100(16.6)
C67	Yan Wu	Beijing	2011	2011-2012	2001	2001-2007	300	Convenient	4(1.33)
C69	Jun Xu	Hubei	2013	2013-2016	2012	2011-2012	7123	Convenience	228(3.2)		6584(92.4)
C7	Ling Chang	Yunnan	2014	2013-2016	2011-2012	2011-2012	911	Snowball	22(2.41)	13(1.43)	485(56.4)	39(25.61)
C70	Jinling Xu	Liaoning	2015	2013-2016	2012	2011-2012	475	Convenience	12 (2.5)	29(6.1)		50(34.0)
C71	Pingping Yan	Fujian	2013	2013-2016	2010	2008-2010	2680	Convenience	39(7.1)	79(14.3)	1248	806
C72	Yinghua Yang	Jiangxi	2014	2013-2016	2012	2011-2012	830	Convenience	25(3)
C73	Luguang Yang	Anhui	2012	2011-2012	2010-2011	2008-2010 2011-2015	264	Convenience	15(5.7)		92(34.8)	69(26.3)
C74	Wenxiang Yu	Jiangsu	2014	2013-2016	2011-2012	2011-2012	506	Convenience, Snowball	58(11.46)	31(6.13)
C75	Huifang Zeng	Guangdong	2006	2001-2007	2004	2001-2007	273	Convenience	5(2.7)	15.8
C76	Jianming Zhang	Shandong	2013	2013-2016	2009-2011	2008-2010 2011-2015	687	Convenienec	8(1.16)	89(12.95)
C77	Qian Zhang	Guangdong	2012	2011-2012	2009-2010	2008-2010	300	RDS	21(7)	36(12)	140(70)	101(50)
C78	Xiao Zhang	Shanghai	2013	2013-2016	2008-2012	2008-2010 2011-2015	597	Convenience	580(14.3)
C79	Xin Zhang	Guangdong	2014	2013-2016	2009-2012	2008-2010 2011-2012	3445	Convenience	281(10.2)	170(17.54)
C8	Yue Chen	Jiangsu	2014	2013-2016	2012	2011-2012	421	Snowball	25(6.1)	33(8.05)
C80	Yi Zhang	the Xinjiang Uygur Autonomous Region	2008	2008-2010	2007	2001-2007	143	Convenience	8(5.6)	14(9.8)
C81	Wanjun Zhang	Yunnan	2014	2013-2016	2012	2011-2012	2527	Conveiniece	224(8.9)	83(3.3)	1839(79.3)
C82	Tao Zhao	Henan	2013	2013-2016	2010-2011	2008-2010 2011-2012	429	Convenience			168(39.16)
C83	Luxiang Zheng	Fujian	2012	2011-2012	2010-2011	2008-2010 2011-2015	403	Convenience, Snowball	15(3.7)	9(2.2)	221(54.8)	1(7.1)
C84	Yanwei Zhong	Guangdong	2014	2013-2016	2009-2011	2008-2010 2011-2012	476	Convenience	53(11.13)	47(9.87)	82(27.8)	30(16.48)
C85	Hong Zhou	Hebei	2011	2011-2012	2012	2011-2012	400	Convenience, stratified Snowball	9(2.25)	43(10.75)	165(50.15)	96(69.06)
C86	Jinling Zhou	Liaoning	2013	2013-2016	2008	2008-2010	1258	Convenience	58(4.61)		601(55.7)	201(54.03)
C89	Quanhua Zhou	Chongqing municipality	2011	2011-2012	2008	2008-2010	743		123(16.55)	63(8.16)
C9	Baifen Chen	Guangdong	2013	2013-2016	2010	2008-2010	400	Snowball	42(10.5)	99(24.75)	49(13.88)
C90	Xiaojun Zhou	Jiangsu	2014	2013-2016	2011-2013	2011-2012 2013-2015	169	Convenience	12(7.1)	33(19.5)
C91	Yanqiu Zhou	Shanghai	2012	2011-2012	2011-2013	2011-2012 2013-2015	294	Conveinience	18(6.1)	28(9.5)
C92	Zhenhai Zhou	Beijing	2010	2008-2010	2008	2008-2010	550	Convenience	25(4.5)	161(29.3)
C93	Houhong Zhu	Sichuan	2011	2011-2012	2008-2009	2008-2010	469	RDS	70(14.93)	40(8.53)
C94	Kejing Zhu	Guangdong	2012	2011-2012	2011	2011-2012	91	Convenience	4(4.4)		35(42.7)
C95	Jijun Chen	Gansu	2014	2013-2016	2006-2010	2001-2007 2008-2010	889	Snowball	53(5.96)	264(12.63)
C96	Xiaowei Qiao	Gansu	2009	2008-2010	2008	2008-2010	619	Convenience	30(4.85)	64(10.34)
C97	Fucai Quan	Gansu	2008	2008-2010	2007	2001-2007	208
C98	Caixiao Zhou	Guizhou	2011	2011-2012	2010	2008-2010	109	Venue-based	11( 10.98)	6.5
C99	Yang Chen	Guizhou	2013	2013-2016	2008-2009	2008-2010	1045	Snowball	193(18.5)
E10	Kaili Wang	Heilongjiang	2011	2011-2012	2006	2001-2007	401	Snowball	4(1.0)
E100	Hongjing Yan	Jiangsu	2016	2013-2016	2008-2012	2008-2010 2011-2015	510	RDS	Crude: 2008: 20(4.7) 2012: 54(9.2) Adjusted: 2008: 6.6 (2.5–11.3) 2012: 10.1 (6.6–13.9)	Crude: 2008: 54(12.6) 2012: 67(11.4) Adjusted: 2008: 14.3 (8.6–21.9) 2012: 9.9 (6.9–13.8)	282
E101	Huamei Yan	Shanghai	2015	2013-2016	2012-2013	2011-2015	535		10.7
E102	Gengfeng Fu	Jiangsu	2015	2013-2016	2009	2008-2010	413	Convenience	11.62	20.34
E103	Jinlei Qi	Beijing, Shanghai, Tianjin, Chongqing, Heilongjiang, Liaoning, Shandong, Shanxi山西, Jiangsu, Hubei, Zhejiang, Hunan, Yunnan, Guangdong, Hainan	2015	2013-2016	2011	2011-2012	33684		6.27	6.5
E104	Qiaoqin Ma	Zhejiang	2015	2013-2016	2013-2014	2011-2015	424		Crude: 98 (23.1) Adjusted: 22.8 (16.9–28.5)	Crude: 52 (12.3) Adjusted: 9.7 (6.4–13.6)		82(53.3)
E105	Yi Wang	Hunan	2015	2013-2016	2009-2011	2008-2010 2011-2012	725	RDS, Snowball
E106	Yan Luo	Zhejiang	2015	2013-2016	2011	2011-2012	259	Multiple	23 (8.9%)	33 (12.7%)
E107	Na Wang	Chongqing municipality	2016	2013-2016	2011	2011-2012	391	RDS	18.7	MSM without recent sexual debut: 9(6.7) MSM With recent sexual debut: 7(2.7)
E108	Xiangwei Li	Sichuan Shanxi Shanxi	2016	2013-2016	2012-2013	2011-2012 2013-2015	889	no sampling frame	109(12.26)
E109	Larry Han	Guangdong Chongqing municipality	2016	2013-2016	2013	2013-2015	1195	Convenience	Self-reported 49(6.1)
E11	Zunyou Wu	61 cities	2013	2013-2016	2008-2009	2008-2010	47231	92% Snowball; 8% RDS	4.9%(4.7-5.1)	5552(11.8)
E110	Yu Liu	Beijing	2016	2013-2016	2013-2014	2013-2015	3588	Multiple	455 (12.7)
E111	Hanzhu Qian	Beijing	2016	2013-2016	2010-2011	2008-2010 2011-2012	1155	Snowball	48 (5.3%)	298 (26.1%)
E112	Hongcheng Shen	Jiangsu, Chongqing municipality, Shandong, Heilongjiang, Guangdong, Zhejiang	2016	2013-2016	2008-2009	2008-2010	2958	RDS, Snowball	228(7.71)	442(14.27)
E113	Yan Cui	sentinel sites nationwide	2016	2013-2016	2010-2014	2008-2010 2011-2012 2013-2015	2010: 34009 2011: 37094 2012: 39949 2013: 42582 2014: 42951	Quota	2010: 5.73 2011: 6.32 2012: 6.69 2013: 7.30 2014: 7.75
E114	Dongliang Li	Beijing	2016	2013-2016	2009-2010	2008-2010	962	Community outreach
E115	Yanyan Liu	Anhui	2016	2013-2016	2013-2014	2011-2015	587	Snowball	73 (12.44)	56 (9.54)	312 (57.78)	40 (36.36)
E13	Kyung-Hee Choi	Beijing	2003	2001-2007	2001-2002	2001-2007	481	Convenience	3.1
E14	Qun He	Guangdong	2006	2001-2007	2003	2001-2007	201	Convenience		10.5
E15	Shengyuan Liu	Heilongjiang	2010	2008-2010	2008	2008-2010	1353	Multiple	31(2.3)
E16	Min Zhang	Liaoning	2011	2011-2012	2007	2001-2007	229		13(5.7)	42(18.3)
E17	Kyung-Hee Choi	Shanghai	2007	2001-2007	2004-2005	2001-2007	475		1.47(0.59-3.01)	64(13.47)
E18	Yuhua Ruan	Beijing	2007	2001-2007	2005	2001-2007	526		17(3.2)	59(11.2)
E19	Xiaoyan Ma	Beijing	2007	2001-2007	2004	2001-2007	325	RDS	Crude: 5(1.5) Adjusted: 0.4(0.1,0.8)	25(7.7)
E20	Shiman Ruan	Shandong	2008	2008-2010	2007	2001-2007	428	RDS	Crude: 3(0.7) Adjusted: 0.5(0.1,1.0)	21(4.9)
E21	Yuhua Ruan	Beijing	2009	2008-2010	2006-2007	2001-2007	507	Multiple		93(18.3)			71(14.0)
E22	Xiaoxi Zhang	Beijing	2007	2001-2007	2005-2006	2001-2007	753		17(2.1)	53(7.0)
E25	Qianqiu Wang	Jiangsu	2014	2013-2016	2009-2010	2008-2010	352	Snowball	46(14.5)	98(30.9)
E26	Hengyi Mao	Beijing	2014	2013-2016	2009	2008-2010	547	Multiple	36(6.6)
E27	Junjie Xu	Yunnan, Liaoning, Shandong, Hunan, Henan, Jiangsu, Shanghai	2014	2013-2016	2012-2013	2011-2012 2013-2015	3834	Multiple	354(9.2)	466(12.2)
E28	Xuefeng Li	Chongqing municipality	2014	2013-2016	2009	2008-2010	510	RDS	59(11.6)	26(5.1)
E29	Weibin Cheng	Guangdong	2014	2013-2016	2008	2008-2010	379	Snowball
E3		Chongqing municipality	2009	2008-2010	2006	2001-2007	1000	Convenience	104(10.4)	93(9.3)	444(56.2)
E30	Xue Bai	Tianjin	2014	2013-2016	2011-2012	2011-2012	1642	Snowball, convenience	203(12.4)
E31	Xiaofang wang	Guangxi	2014	2013-2016	2008	2008-2010	1146	Multiple	20(1.7)	59(5.1)
E33	Yali Zeng	Sichuan	2014	2013-2016	2009	2008-2010	568		13.3	90(15.8)	321(51.1)
E34	Weiming Tang	Jiangsu	2015	2013-2016	2008	2008-2010	430	RDS	20(4.7)
E35	Juan Jiang	Jiangsu	2006	2001-2007	2003	2001-2007	144	Convenience	0	27(18.8)
E36	Hongling Bai	Jiangsu	2012	2011-2012	2008	2008-2010	280	Snowball	20(7.1: 4.41-10.82)	42(15.0)	201(78.8)	63(48.5)	104(52)
E37	Eric P.F. Chow	Yunnan	2013	2013-2016	2010	2008-2010	105	nomination and Snowball			70(81.4)
E38	Jin Zhao	Guangdong	2015	2013-2016	2012	2011-2012	621	RDS	Crude: 59(9.5) Adjusted: 8.4(5.9-11.7)	122(19.6)
E39	Wensheng Fan	Beijing	2014	2013-2016	2010-2011	2008-2010 2011-2012	887	Convenience	47(5.3)	148(16.7)
E41	Dongyan Zhang	Guangdong	2014	2013-2016	2009	2008-2010	408		6.9	24.5
E42	Tiejian Feng	Guangdong	2008	2008-2010	2005-2007	2001-2007	1376	Multiple	46(3.3)	9.9-22.6
E43	Meizhen Liao	Shandong	2014	2013-2016	2011	2011-2012	1230	Convenience	20(1.6)		794(70.8)	149(52.1)
E44	Xuefeng Li	Beijing	2014	2013-2016	2009	2008-2010	501	RDS	36(7.2)
E45	Zhenxing Chu	Liaoning	2013	2013-2016	2010-2011	2008-2010 2011-2012	626	Convenience	31(5.0)			88(79.3)	179(52.2)
E46	Meihua Jin	Zhejiang	2013	2013-2016	2011	2011-2012	401	Convenience
E47	Zhen Cao	Beijing, Heilongjiang, Henan, Sichuan	2014	2013-2016	2008-2009	2008-2010	858	Snowball	69(8.0)
E48	Eric P.F. Chow	Hunan, Tianjin	2013	2013-2016	2011	2011-2012	447	Convenience				20(50.0)
E50	Song Fan	Beijing	2012	2011-2012	2009	2008-2010	501	RDS	Crude: 36(7.2) Adjusted: 8(4.6,12.2)	Crude: 110(22.0) Adjusted: 22.0(16.8-27.0)		75(72.1)
E51	L. Huang	Guangdong	2014	2013-2016	2011	2011-2012	1100	Convenience			592(71.7)
E52	Joseph Lau	Hongkong	2013	2013-2016	2008	2008-2010	245	Convenience
E53	Yuji Feng	Sichuan	2010	2008-2010	2007	2001-2007	513	Snowball	Crude: 49 (9.1) Adjusted: (6.7, 11.5)	144(28.1)			149(38.6)
E54	Yan Guo	Beijing	2011	2011-2012	2009	2008-2010	307	Convenience	18(5.9)	62(20.2)
E55	Xiaoxu Han	Liaoning	2011	2011-2012	2009-2010	2008-2010	1765	Convenience	Adjusted: 6.6(5.5, 7.9)
E56	Yifei Hu	Beijing	2013	2013-2016	2010-2011	2008-2010 2011-2012	671	Convenience	212(31.6)
E57	Qianghai Hu	Liaoning	2013	2013-2016	2010	2008-2010	438						249(56.8)
E58	Xiping Huan	Jiangsu	2013	2013-2016	2008	2008-2010	416	RDS	Crude: 19(4.7) Adjusted: 7.3(2.6,10.2)	Crude: 50(12.3) Adjusted: 14.4(9.3, 21.1)			129(31.7)
E59	Xiping Huan	Jiangsu	2013	2013-2016	2008-2010	2008-2010	430	RDS	4.7				226(52.6)
E61	Joseph Lau	Guangdong	2013	2013-2016	2007-2008	2001-2007 2008-2010	195	Convenience					46(27.9)
E62	Dongliang Li	Beijing	2010	2008-2010	2006-2007	2001-2007	507	Convenience
E63	Dongliang Li	Beijing	2012	2011-2012	2009	2008-2010	797	Convenience		131(16.4)			103(12.9)
E64	Meizhen Liao	Shandong	2011	2011-2012	2008-2009	2008-2010	2996	Convenience	2.5		758(27.9)
E65	Jie Liu	Henan	2013	2013-2016	2010	2008-2010	388	Convenience	51(13.3)	40(27.5)	227(66.4)	73(38.2)
E66	Yingjie Liu	Beijing	2012	2011-2012	2009	2008-2010	307	Convenience
E67	Jie Liu	Liaoning	2012	2011-2012	2009	2008-2010	268	Convenience
E69	Zhihang Peng	Jiangsu	2012	2011-2012	2008	2008-2010	278	Snowball			129(52.0)	31(21.2)
E70	Yuhua Ruan	Beijing	2014	2013-2016	2010	2008-2010	500	RDS	18(3.6)
E71	M She	Beijing, Heilongjiang, Henan, Sichuan	2013	2013-2016	2008	2008-2010	1390	Snowball	97(6.9)	166(11.9)	1013(72.9)
E72	Jun Tao	Beijing	2013	2013-2016	2010-2011	2008-2010 2011-2012	520	Convenience	28(5.7)	82(16.8)
E73	Jin Zhao	Guangdong	2014	2013-2016	2008-2009	2008-2010	801	TLS	56(7.0)	162(20.2)		128(16.0)
E74	Ling Zhang	Heilongjiang	2013	2013-2016	2011	2011-2012	463	Snowball	44(9.5)	66(14.3)
E75	Chuachun Zou	Beijing, the Xinjiang Uygur Autonomous Region	2013	2013-2016	2007	2001-2007	399		20(4.8)
E76	Zixin Wang	Jiangsu	2013	2013-2016	2009-2012	2008-2010 2011-2015	168	Convenience			80(47.6)
E77	Jin zhao	Guangdong	2012	2011-2012	2008-2009	2008-2010	850	TLS	38(4.5)	Adjusted: 5.22(2.48-10.98)
E78	Lan Zhang	Chongqing municipality	2012	2011-2012	2009	2008-2010	503	RDS	Adjusted: 15.7(10.8, 21.8)	26(5.2)	123(26.2)
E79	Hongjing Yan	Jiangsu	2012	2011-2012	2008	2008-2010	417			53(12.7)
E8	Guang Zeng	Chongqing municipality	2014	2013-2016	2006	2001-2007	561	Multiple	73(13.0)	54(9.6)	242(51.9)
E80	Yan Xiao	Chongqing municipality	2009	2008-2010	2006-2007	2001-2007	1692		182(10.8)	8.6	829(60.9)	130(35.8)
E81	Xiangjun Zhang	Beijing	2013	2013-2016	2010	2008-2010	302	Snowball	Adjusted: 30(9.9)	58(19.2)
E82	Haitao Yang	Jiangsu	2010	2008-2010	2008	2008-2010	397	RDS	19(4.57)	49(12.3)			121(30.5)
E83	Ling Zhang	Heilongjiang	2007	2001-2007	2002	2001-2007	215	Convenience	2(1.3)	2(1.3)
E84	Junjie Xu	Liaoning	2010	2008-2010	2006	2001-2007	218		13(5.7)	73(33.4)
E85	Zhenhua Duan	Sichuan	2015	2013-2016	2009-2014	2008-2010 2011-2012 2013-2015	2422	Snowball	375(15.5)		1524 (70.0)	226 (56.2)
E86	Aritra Das	Jiangsu, Chongqing, Shandong, Heilongjiang, Guangdong	2015	2013-2016	2008	2008-2010	2936	Snowball	7.7	14.3	1646(66.1)
E87	Joseph T.F. Lau and Dongliang Li	Beijing	2015	2013-2016	2009-2012	2008-2010 2011-2012	228	no sampling frame
E88	Haijiang Lin	Zhejiang	2015	2013-2016	2013	2011-2015	620	Convenience	11.3
E89	Wenlong Gao	Gansu	2015	2013-2016	2008-2009	2008-2010	600	Snowball	6	18
E9	Fei Zhong	Guangdong	2014	2013-2016	2008	2008-2010	379	Snowball	19(5.9)
E90	Heng Zhang	Beijing	2015	2013-2016	2009-2012	2008-2010 2011-2012	1230	Snowball	8	15
E92	Dongliang Li	Beijing, Sichuan	2015	2013-2016	2012	2011-2012	307	Convenience
E93	Qiaoqin Ma	Zhejiang	2015	2013-2016	2012	2011-2012	354	Representative
E94	Zhongwei Jia	Beijing	2015	2013-2016	2007-2012	2001-2007 2008-2010 2011-2012	3625	no sampling frame		11.7 (9.4–14.0)
E95	Lei Chen	Jiangsu, Chongqing, Shandong, Heilongjiang, Guangdong	2016	2013-2016	2008-2009	2008-2010	2958	RDS, Snowball	228(7.71)	422(14.27)
E96	Guowu Liu	Beijing	2015	2013-2016	2009-2011	2008-2010 2011-2012	1003			7.8/100 PY (6.2–9.7).
E97	Eric P.F. Chow	Hunan	2015	2013-2016	2009-2011	2008-2010 2011-2012	642	Snowball				27(39.7)
E98	Yuejuan Zhao	Beijing	2015	2013-2016	2009-2011	2008-2010 2011-2012	1312	Snowball	7.9	15.4
E99	Weiming Tang	Nanjing, Chongqing, Shandong, Heilongjiang,Guangdong, Zhejiang	2015	2013-2016	2008-2009	2008-2010	2618	RDS, Snowball	195(7.45)	375(14.32)
